# Supplementary material for: Isolation and detection of single molecules on paramagnetic beads using sequential fluid flows in microfabricated polymer array assemblies
Source: Royal Society of Chemistry journal article supplement (doi:10.1039/c2lc20744c), 2011-12-16
Supplement: c2lc20744c.pdf [file c2lc20744c.pdf]

### Supplementary Information

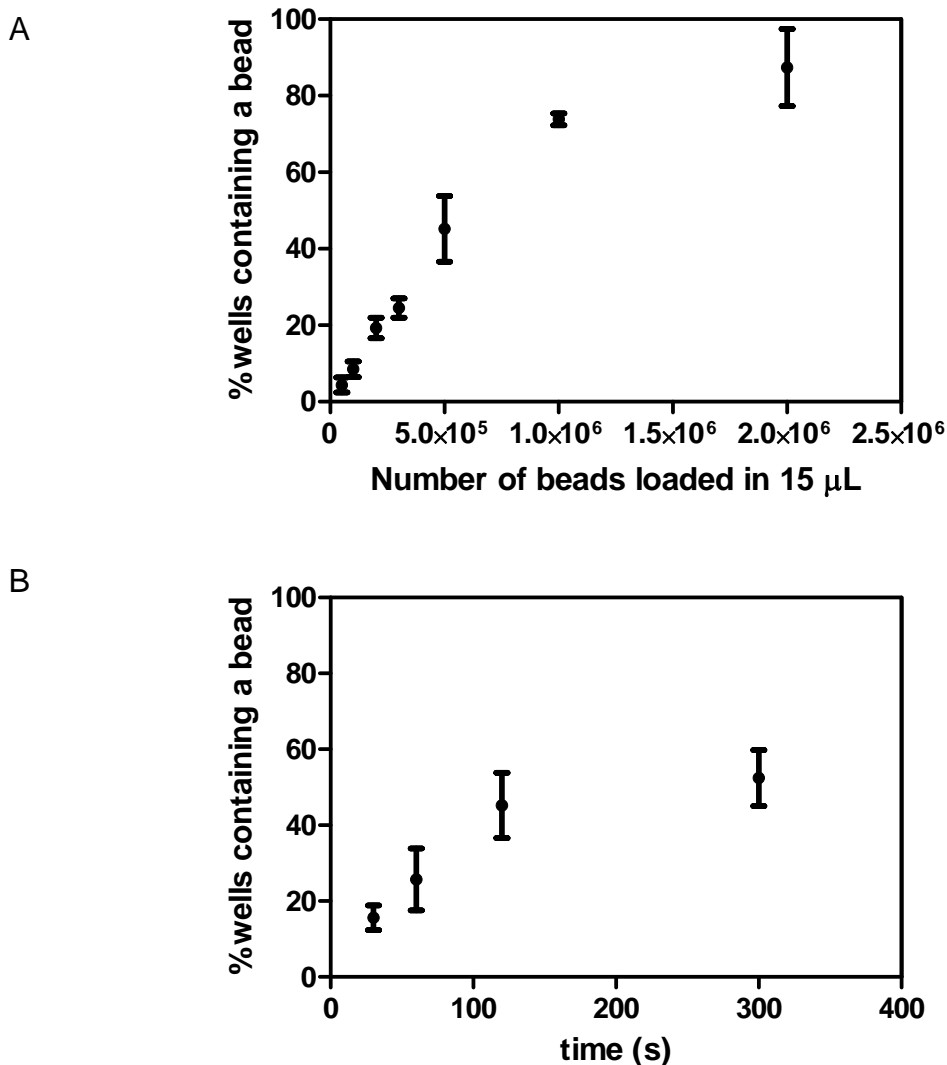

**Supplementary Figure 1.** Bead loading efficiency as a function of bead concentration and time. (A) Plot of the fraction of wells occupied by a single bead (“bead loading efficiency”) as a function of the number of beads in 15  $\mu\text{L}$  loaded. Fluorescent beads were loaded into the polymer array assemblies and settled by gravity for 2 min; 68,857 wells of the fluorescently imaged arrays were analyzed. (B) Plot of the fraction of wells occupied by a single bead as a function of the settling time for 500,000 beads in 15  $\mu\text{L}$  loaded into the polymer array assemblies. Error bars represent standard deviations in bead loading efficiency over three arrays.
